# Supplementary material
Source: PubMed Central journal article supplement (PMC3354058)
Supplement: cdd2011198x1.pdf [file cdd2011198x1.pdf]

## Supplemental data

### Supplemental materials and methods

#### *RNA extraction and RT-PCR*

Total cellular RNA was isolated using the RNeasy kit (Qiagen) according to the manufacturer's instructions. The first-strand cDNA was generated by reverse transcription of 5  $\mu$ g total RNA using oligo(dT) oligonucleotides. PCR was performed with the following specific primers 5'-GAGAAGGTGGACAATTGCAG-3' and 5'-TCAATGCCTTCTCCATACCA-3' for Bim (Bim<sub>EL</sub>, Bim<sub>L</sub> and Bim<sub>S</sub> isoforms) and 5'-GATTAGCGATGATGAACCAGGT-3' and 5'-AGTTAAAGTTGAGAGATCATCTC-3' for HPRT.

PCR products were resolved by electrophoresis in 1.8% agarose gels, transferred onto nylon membranes (Amersham Hybond-N<sup>+</sup>) and detected by southern blotting.

### Supplemental figures

#### Titles and Figure legends

**Figure S1: DEF2 mutation interferes with the normal splicing of the *Bim* gene and thereby inhibits expression of Bim<sub>L</sub> and Bim<sub>S</sub>.**

(a) Expression of Bim isoforms and b-actin (loading control) in thymocytes and splenocytes of two wildtype and two  $\Delta$ DEF2 mice was analyzed by Western blotting. Two different exposures of the immunoblot are shown. (b) The presence of the mRNA species encoding Bim<sub>EL</sub>, Bim<sub>L</sub>, Bim<sub>S</sub> and HPRT in thymocytes and splenocytes of wildtype or  $\Delta$ DEF2 mice was analyzed by RT-PCR.

**Figure S2: Hematopoietic cell composition in Bim mutant mice.**

(a-b) The percentage of lymphocytes (a) and neutrophils (b) in blood from wildtype,  $\Delta$ DEF2, Bim<sub>EL</sub>-only and Bim<sub>L</sub>-only mice were determined using an ADVIA blood analyzer. (c) The numbers of platelets (10<sup>6</sup>/mL) in blood from wildtype,  $\Delta$ DEF2, Bim<sub>EL</sub>-only and Bim<sub>L</sub>-only mice were measured by using an ADVIA blood analyzer. Data represent mean (+/-SEM) of at

least n=20 mice per genotype (p>0.05). (d) The percentages of B cells and CD4<sup>+</sup> as well as CD8<sup>+</sup> T cells in lymph nodes of wildtype and the various Bim mutant mice were determined by FACS analysis after staining with antibodies to the cell surface markers B220, CD4 and CD8. Data represent mean (+/-SEM) of at least n=14 per genotype. (p> 0.05). (e) The numbers of CD4<sup>+</sup>CD8<sup>+</sup>, CD4<sup>+</sup>CD8<sup>-</sup> and CD4<sup>-</sup>CD8<sup>+</sup> thymocytes were determined by FACS analysis. Data represent mean (+/-SEM) of at least n=13 per genotype (p> 0.05). (f) The numbers of B cells and CD4<sup>+</sup> as well as CD8<sup>+</sup> T cells in spleens of wildtype, ΔDEF2, Bim<sub>EL</sub>-only and Bim<sub>L</sub>-only mice were determined by FACS analysis (see above). Data represent mean (+/-SEM) of at least n=13 mice per genotype (p> 0.05).

**Figure S3: Sensitivity of CD4<sup>+</sup>CD8<sup>+</sup> thymocytes to different apoptotic stimuli.**

CD4<sup>+</sup>CD8<sup>+</sup> thymocytes from wildtype, ΔDEF2, Bim<sub>EL</sub>-only and Bim<sub>L</sub>-only mice were FACS sorted and treated with PMA (10 ng/mL) (a), Taxol (1 μg/mL) (b) or the BH3 mimetic ABT-737 (1 μM) (c). Cell survival was assessed daily by PI staining and FACS analysis. Data represent mean (+/-SEM) of n=3 to 5 independent mice per genotype. (p> 0.05).

**Figure S4: *In vitro* activation of wildtype, ΔDEF2, Bim<sub>EL</sub>-only and Bim<sub>L</sub>-only T lymphocytes.**

Same experiments as shown in Figure 6. The absolute numbers of cells are shown to illustrate the normal mitogen induced proliferation of the T lymphocytes from the various mutant strains of mice.

**Figure S5: *In vitro* activation of wildtype, ΔDEF2, Bim<sub>EL</sub>-only and Bim<sub>L</sub>-only B lymphocytes.**

(a-d) Purified B lymphocytes (2x10<sup>6</sup> cells/mL) from wildtype, ΔDEF2, Bim<sub>EL</sub>-only and Bim<sub>L</sub>-only mice were left untreated or stimulated with anti-IgM Fab<sub>2</sub> antibody fragments (10 μg/mL) plus anti-CD40 mAbs (5 μg/mL) in medium containing saturating concentrations of recombinant mouse IL-2, IL-4 and IL-5 for 24, 48 and 120 h. The percentages and numbers of

activated (CD25<sup>+</sup>FSC<sup>hi</sup>) (a and c) and surviving (PI-FSC<sup>hi</sup>) T cells (b and d) were measured after 24, 48 and 120 h of culture. Data represent mean (+/-SEM) of at least 3 to 4 mice per genotype ( $p > 0.05$ ).

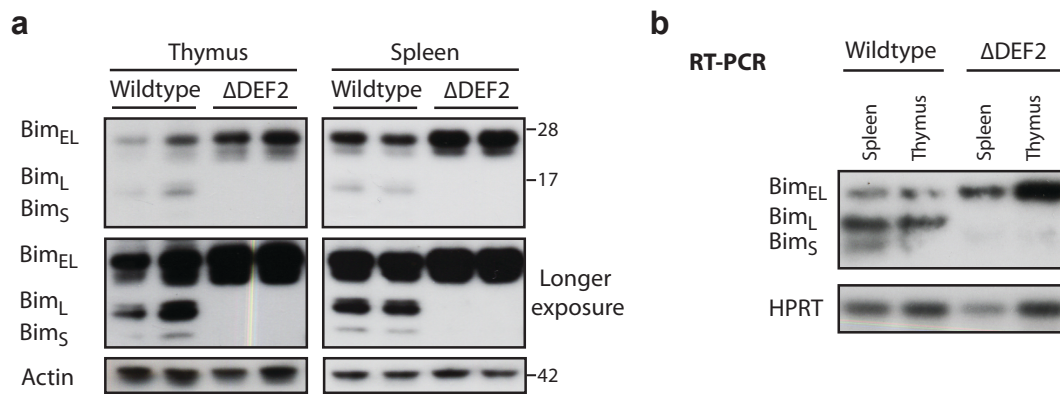

Figure S1

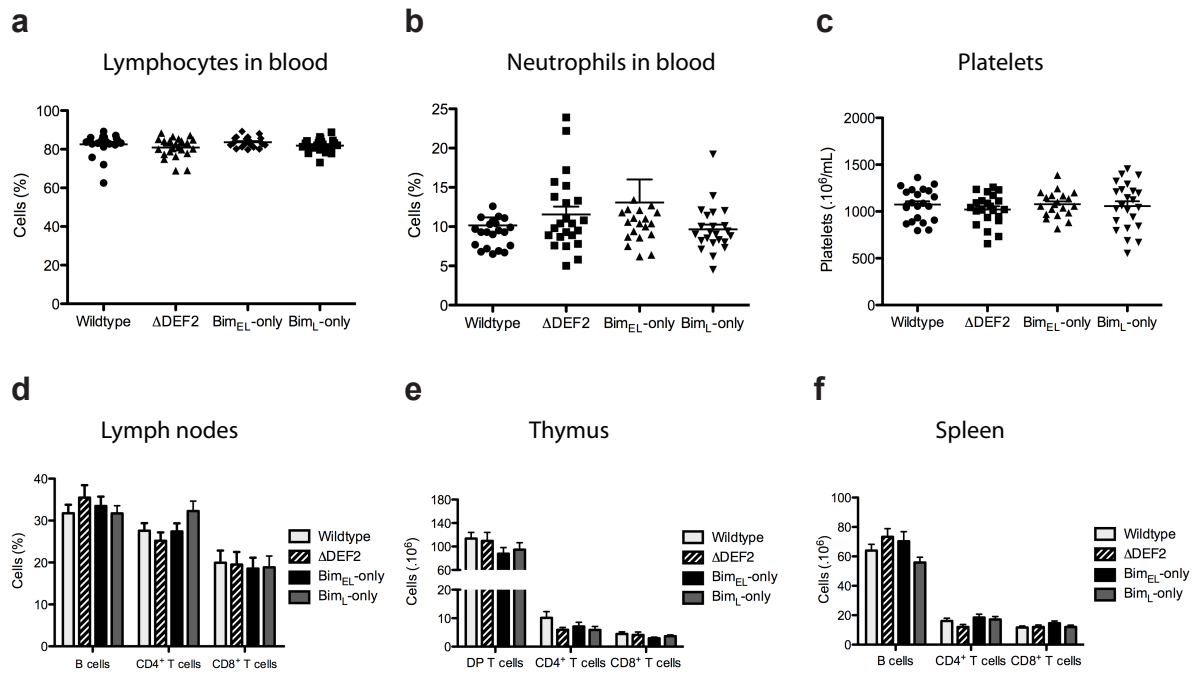

Figure S2

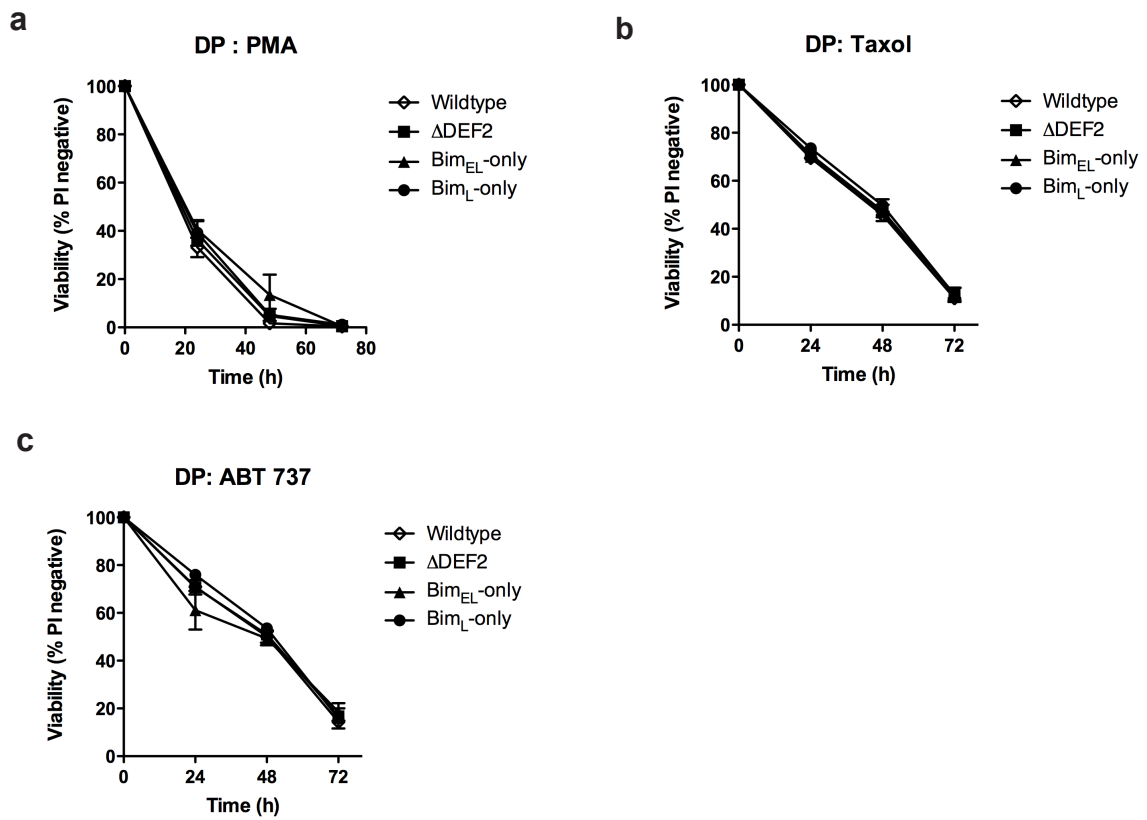

Figure S3

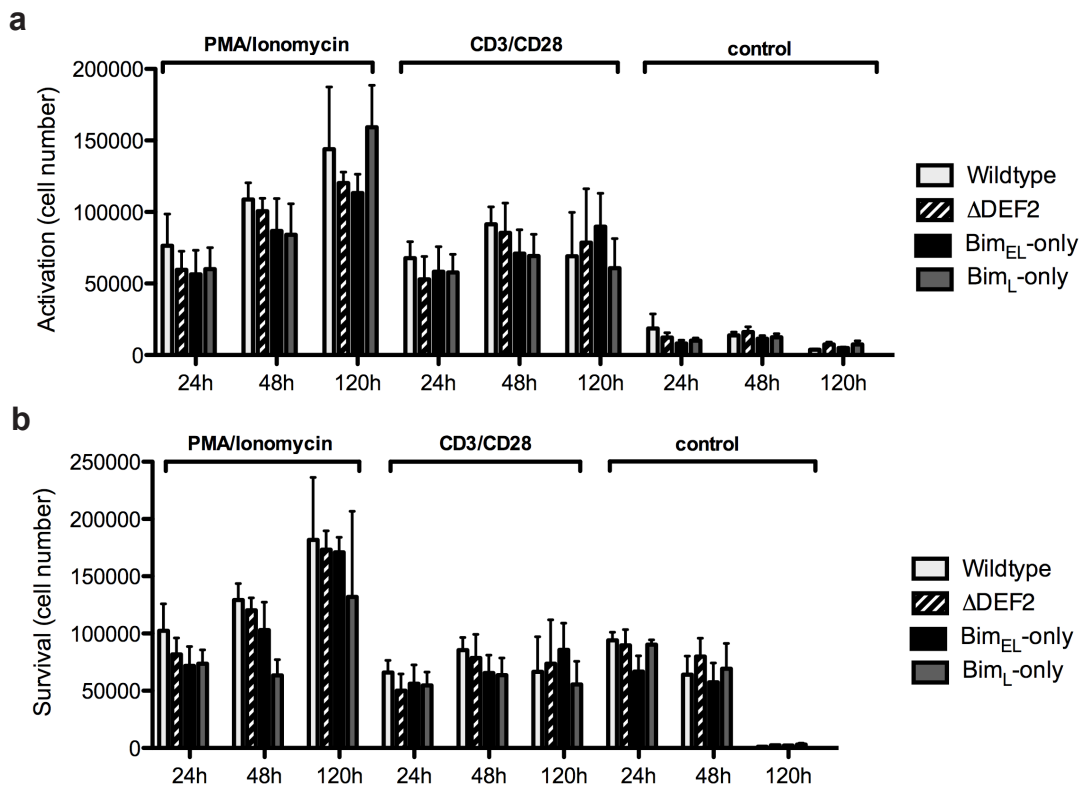

Figure S4

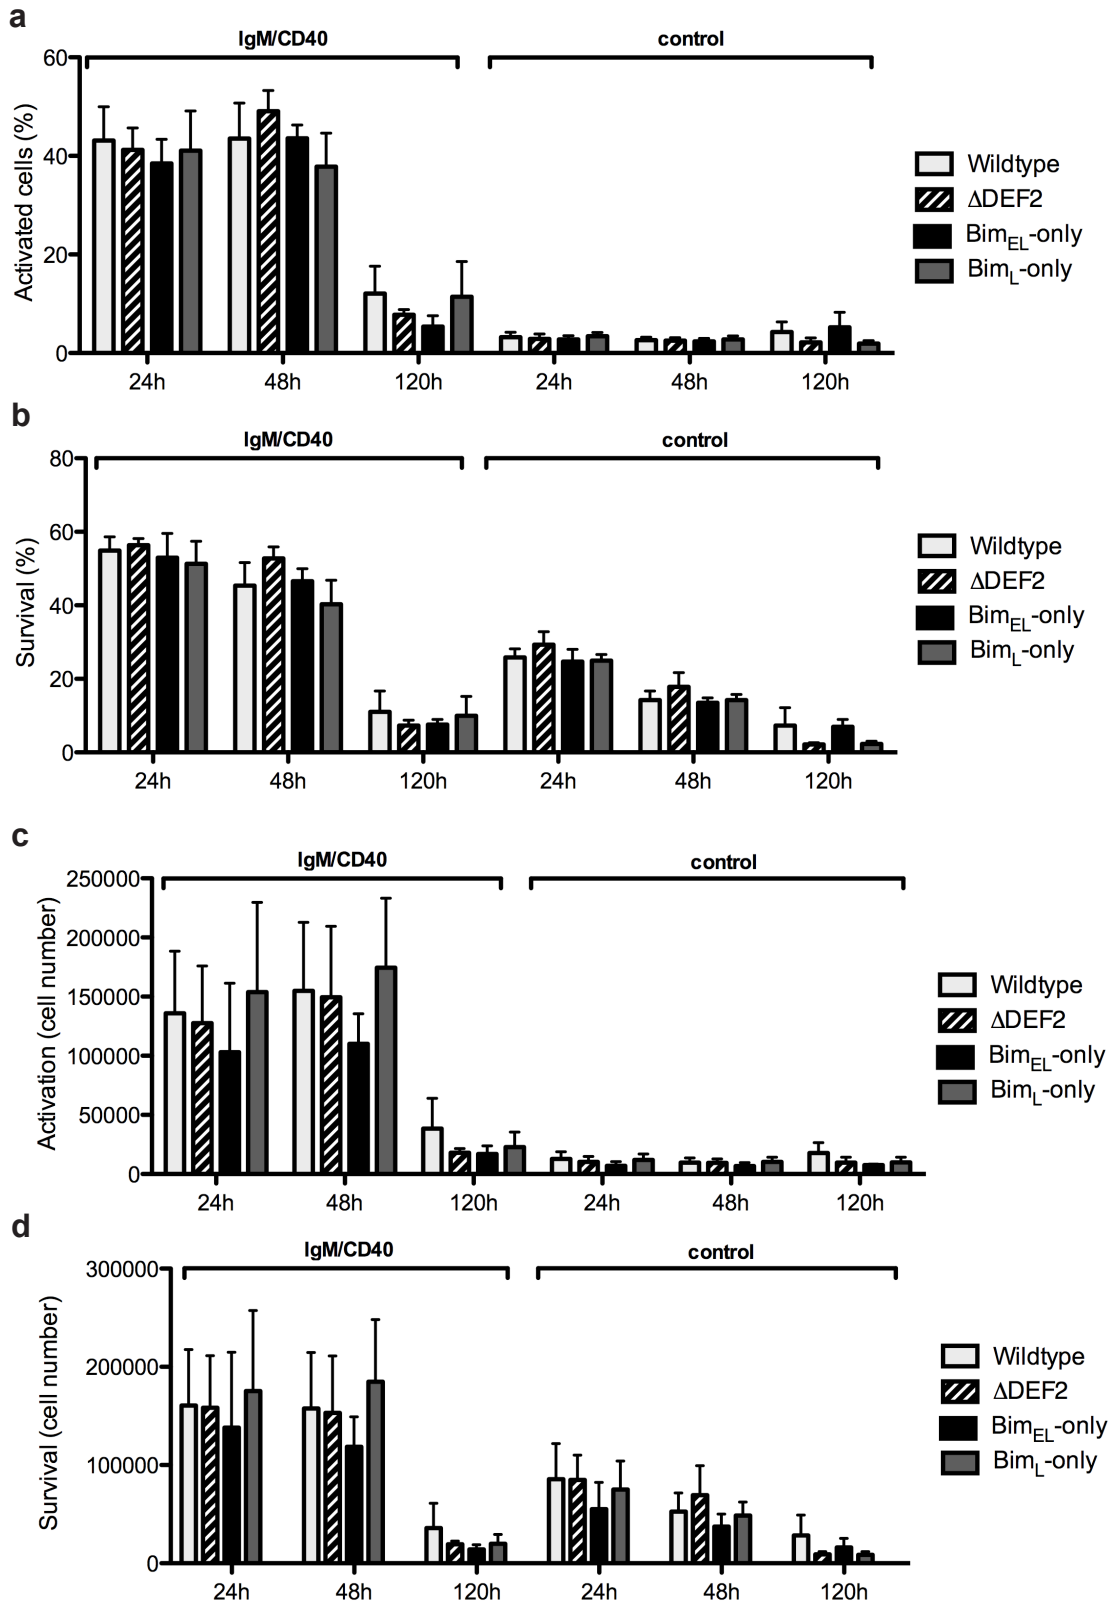

Figure S5
